# Supplementary material for: Characterization of ROS Metabolic Equilibrium Reclassifies Pan-Cancer Samples and Guides Pathway Targeting Therapy
Source: Front Oncol. 2020 Oct 20;10:581197. doi: 10.3389/fonc.2020.581197 (PMC7606976; doi:10.3389/fonc.2020.581197)
Supplement: Supplementary file 6 [file Data_Sheet_6.XLSX]

## Sheet: INDEX I
Cancer type	Ln(HR)	Ln(LOW95)	Ln(HIGH95)	P	Z
	列1	列2	列3	列4	列5
ACC	1.9564	-8.72292	12.6357	0.719553	0.359056
BLCA	-3.08094	-5.71069	-0.451189	0.0216623	-2.29624
BRCA	-1.55888	-5.41312	2.29536	0.427939	-0.792723
CESC	-2.95201	-7.90705	2.00303	0.242941	-1.16767
CHOL	-3.93974	-17.6782	9.79868	0.574079	-0.562055
CRC	-1.36718	-5.54927	2.81491	0.521694	-0.640737
ESCA	0.968779	-3.87118	5.80874	0.694828	0.392312
GBM	-1.10862	-5.42934	3.21209	0.615039	-0.502894
HNSC	-2.74994	-5.79307	0.293187	0.0765385	-1.77113
KICH	8.9192	-8.02143	25.8598	0.302111	1.03192
KIRC	10.4344	6.09207	14.7768	2.48109e-06	4.70968
LGG	-7.19324	-12.2321	-2.15434	0.00514311	-2.79793
LICH	2.95381	-0.541138	6.44877	0.0976217	1.65649
LUAD	-1.4533	-4.94149	2.0349	0.414166	-0.816584
LUSC	-2.80565	-6.03304	0.421738	0.0884098	-1.70385
OV	-2.11557	-4.89225	0.6611	0.135355	-1.49331
PAAD	-3.26118	-10.5296	4.00723	0.379188	-0.879393
PRAD	-2.35094	-20.2123	15.5105	0.796428	-0.257972
SKCM	-0.243505	-4.2557	3.76869	0.905313	-0.118953
STAD	-2.7617	-6.66468	1.14129	0.165489	-1.38684
THCA	0.541873	-14.1506	15.2344	0.942375	0.0722854
UCEC	-3.58758	-8.19876	1.0236	0.127287	-1.52489

## Sheet: INDEX II
Cancer type	Ln(HR)	Ln(LOW95)	Ln(HIGH95)	P	Z
	列1	列2	列3	列4	列5
ACC	-0.432219	-6.58365	5.71921	0.890467	-0.137713
BLCA	-2.13434	-4.54956	0.280881	0.0832686	-1.73203
BRCA	-0.48675	-3.24867	2.27517	0.729782	-0.345416
CESC	-0.13293	-3.08399	2.81814	0.92965	-0.0882858
CHOL	0.551509	-7.33144	8.43446	0.890933	0.137123
CRC	1.31041	-2.74289	5.36372	0.526311	0.633647
ESCA	-0.44079	-4.90886	4.02728	0.846679	-0.193357
GBM	-0.289018	-4.54875	3.97072	0.894208	-0.132981
HNSC	-3.54113	-6.1177	-0.964558	0.00706656	-2.69369
KICH	7.8249	-2.50791	18.1577	0.137741	1.48426
KIRC	-2.83867	-5.65864	-0.0186941	0.0485005	-1.97296
LGG	-7.55992	-13.2693	-1.85051	0.009453	-2.59522
LICH	-2.78358	-6.36517	0.798004	0.127691	-1.52327
LUAD	-3.59428	-6.35121	-0.837348	0.0106111	-2.55525
LUSC	-2.57665	-4.7138	-0.439495	0.0181267	-2.36302
OV	0.883073	-1.18698	2.95313	0.403094	0.836108
PAAD	-4.48591	-8.62149	-0.350335	0.0335035	-2.126
PRAD	-2.36364	-20.5466	15.8193	0.798893	-0.254781
SKCM	-1.21375	-3.7664	1.33891	0.351372	-0.931932
STAD	0.901579	-2.1069	3.91006	0.556962	0.58736
THCA	3.9201	-6.56777	14.408	0.463811	0.732585
UCEC	4.57531	1.45348	7.69713	0.00407239	2.8725

## Sheet: INDEX III
Cancer type	Ln(HR)	Ln(LOW95)	Ln(HIGH95)	P	Z
	列1	列2	列3	列4	列5
ACC	0.215274	-2.9091	3.33965	0.892577	0.135044
BLCA	-0.460063	-1.56413	0.644004	0.414092	-0.816713
BRCA	-0.704113	-2.17402	0.765798	0.347804	-0.938857
CESC	-0.174785	-1.98318	1.63361	0.849752	-0.189435
CHOL	0.949523	-3.81234	5.71139	0.69593	0.39082
CRC	1.34972	-0.308228	3.00768	0.110581	1.59559
ESCA	0.360098	-1.07283	1.79302	0.622335	0.492544
GBM	-0.465889	-1.94165	1.00987	0.536081	-0.61875
HNSC	0.420149	-0.861057	1.70136	0.520395	0.642736
KICH	-2.92551	-10.3023	4.45125	0.436987	-0.777292
KIRC	0.60138	-0.801893	2.00465	0.400935	0.839953
LGG	1.54521	-0.484282	3.5747	0.135628	1.49227
LICH	-0.791928	-2.32055	0.736695	0.309919	-1.01539
LUAD	0.456301	-0.638629	1.55123	0.414046	0.816795
LUSC	0.77599	-0.187878	1.73986	0.114582	1.57793
OV	0.682395	-0.354676	1.71947	0.197169	1.28966
PAAD	-0.361895	-1.70548	0.981688	0.597556	-0.527918
PRAD	0.227127	-6.33453	6.78878	0.945911	0.0678427
SKCM	-1.94108	-3.3667	-0.515453	0.0076165	-2.66861
STAD	0.830427	-0.405757	2.06661	0.18796	1.31664
THCA	-1.60374	-6.77858	3.5711	0.543576	-0.607415
UCEC	-0.528845	-2.20139	1.1437	0.53544	-0.619723

## Sheet: INDEX IV
Cancer type	Ln(HR)	Ln(LOW95)	Ln(HIGH95)	P	Z
	列1	列2	列3	列4	列5
ACC	-0.526621	-4.90983	3.85659	0.813836	-0.23548
BLCA	-1.47588	-2.47697	-0.474801	0.00385793	-2.88955
BRCA	-0.61749	-2.02815	0.793166	0.390926	-0.85794
CESC	0.702361	-0.823194	2.22792	0.366865	0.902362
CHOL	-1.11699	-6.37768	4.14369	0.677296	-0.416156
CRC	0.0423023	-1.18883	1.27343	0.946307	0.0673455
ESCA	0.580069	-0.797785	1.95792	0.409296	0.825134
GBM	-0.836215	-2.00106	0.328628	0.159423	-1.40701
HNSC	-0.172318	-1.37684	1.0322	0.779177	-0.280391
KICH	0.0956577	-6.55042	6.74173	0.977495	0.02821
KIRC	1.44189	0.239366	2.64442	0.0187683	2.3501
LGG	-0.919134	-1.6651	-0.173166	0.0157377	-2.41494
LICH	0.48735	-0.761857	1.73656	0.444489	0.764636
LUAD	0.3897	-0.703483	1.48288	0.484745	0.698692
LUSC	0.373953	-0.816355	1.56426	0.538058	0.615752
OV	-0.250497	-1.32176	0.820766	0.646733	-0.458305
PAAD	-1.09629	-2.89229	0.69971	0.231551	-1.19637
PRAD	0.0918925	-4.18702	4.37081	0.966426	0.0420915
SKCM	-1.45622	-2.93801	0.0255702	0.0540866	-1.92614
STAD	-0.244227	-1.25758	0.769127	0.636664	-0.472368
THCA	-1.27164	-7.23029	4.68701	0.675744	-0.418277
UCEC	-0.0177944	-1.43514	1.39956	0.980369	-0.0246068

## Sheet: INDEX V
Cancer type	Ln(HR)	Ln(LOW95)	Ln(HIGH95)	P	Z
	列1	列2	列3	列4	列5
ACC	0.267137	-0.0393951	0.573669	0.0876229	1.70807
BLCA	0.0639782	-0.0363399	0.164296	0.211309	1.24997
BRCA	0.082903	-0.108998	0.274804	0.397149	0.846724
CESC	0.0998526	-0.125164	0.324869	0.384439	0.869746
CHOL	-0.0355215	-0.67251	0.601467	0.912967	-0.109297
CRC	0.128883	-0.102918	0.360683	0.275822	1.08975
ESCA	-0.0189275	-0.213069	0.175214	0.84846	-0.191084
GBM	0.00696786	-0.31108	0.325016	0.96575	0.0429393
HNSC	0.0603304	-0.0683157	0.188977	0.358015	0.919153
KICH	0.860211	-0.0874591	1.80788	0.0752264	1.77908
KIRC	0.00315648	-0.43254	0.438853	0.988671	0.0141993
LGG	-0.545696	-0.775498	-0.315894	3.2523e-06	-4.65421
LICH	0.0431797	-0.050275	0.136634	0.365159	0.905579
LUAD	0.0132017	-0.111273	0.137676	0.835328	0.207873
LUSC	-0.0520587	-0.140222	0.036105	0.247144	-1.15731
OV	0.000560549	-0.144268	0.145389	0.993947	0.0075859
PAAD	-0.0916336	-0.434755	0.251487	0.600678	-0.523426
PRAD	0.373864	-0.0879493	0.835677	0.11258	1.5867
SKCM	0.190685	0.0656164	0.315754	0.00280586	2.98824
STAD	-0.0929333	-0.268291	0.0824244	0.298939	-1.03871
THCA	0.244879	-0.419254	0.909013	0.469878	0.722678
UCEC	0.154381	-0.0284686	0.337231	0.0979631	1.65481
